# Supplementary material for: Global Trends, Regional and National Disparities in Infertility Attributable to Sexually Transmitted Infections, Excluding HIV: A Comprehensive Analysis from 1990 to 2021, and Predictions to 2035
Source: Research Square preprint supplement (doi:10.21203/rs.3.rs-6314067/v1), 2025-06-02
Supplement: Supplementary file 1 [file 5ffab27cfe19c0d3d39018e5.docx]

**Table S1A The prevalence of primary infertility impairment due to sexually transmitted infections excluding HIV and their AAPCs from 1990 to 2021 at the global and regional levels**

|  | **1990** | | **2021** | | **1990-2021** | |
| --- | --- | --- | --- | --- | --- | --- |
|  | **Prevalent cases**  **No. (95% UI)** | **ASPR per 100 000**  **No. (95% UI)** | **Prevalent cases**  **No. (95% UI)** | **ASPR per 100 000**  **No. (95% UI)** | **AAPC_95ci** | **P-Value** |
| **Global** | 2190589(1249073,3526404) | 433.10(349.41,532.35) | 3615205(1926017,5978561) | 90.08(48.03,148.05) | 0.15 (0.08 - 0.22) | <0.001 |
| **Age** |  |  |  |  |  |  |
| 15-19 years | 64319(18827,124142) | 25.17(7.37,48.58) | 65121(13286,139353) | 21.45(4.38,45.89) | -0.54 (-0.77 - -0.32) | <0.001 |
| 20-24 years | 229689(103774,393668) | 94.08(42.51,161.25) | 269602(103388,478944) | 91.78(35.20,163.04) | -0.10 (-0.19 - -0.01) | 0.03 |
| 25-29 years | 421782(166044,761665) | 191.63(75.44,346.05) | 557089(189340,1061868) | 191.45(65.07,364.92) | -0.01 (-0.08 - 0.07) | 0.872 |
| 30-34 years | 431969(161012,943357) | 227.22(84.69,496.22) | 641469(196076,1543315) | 214.59(65.59,516.28) | -0.23 (-0.31 - -0.14) | <0.001 |
| 35-39 years | 410427(148941,934244) | 236.62(85.87,538.61) | 705504(218779,1762068) | 253.96(78.75,634.29) | 0.22 (0.10 - 0.35) | <0.001 |
| 40-44 years | 469923(161692,980860) | 335.12(115.31,699.49) | 979946(312279,2115806) | 395.00(125.87,852.84) | 0.53 (0.39 - 0.67) | <0.001 |
| 45-49 years | 162482(37372,402861) | 142.78(32.84,354.01) | 396474(82467,993084) | 168.25(35.00,421.44) | 0.45 (0.09 - 0.80) | 0.014 |
| **Socio-demographic index** |  |  |  |  |  |  |
| High SDI | 478110(245483,769758) | 99.26(50.79,159.20) | 491492(243133,830427) | 93.88(46.65,154.51) | -0.11 (-0.15 - -0.07) | <0.001 |
| High-middle SDI | 311861(169553,529908) | 57.06(30.98,96.61) | 374274(173983,669657) | 55.39(27.13,96.04) | -0.22 (-0.42 - -0.02) | 0.029 |
| Low SDI | 611698(379674,956167) | 142.29(87.01,226.49) | 1178725(660247,1933723) | 116.23(68.28,191.22) | -0.61 (-0.77 - -0.46) | <0.001 |
| Low-middle SDI | 292286(183673,455958) | 121.52(72.54,190.83) | 573577(342435,918689) | 119.82(66.37,197.78) | -0.03 (-0.22 - 0.15) | 0.72 |
| Middle SDI | 494803(280515,811008) | 60.25(33.68,99.50) | 994988(512652,1697076) | 75.99(39.62,129.15) | 0.73 (0.67 - 0.80) | <0.001 |
| **Region** |  |  |  |  |  |  |
| Andean Latin America | 17109(11447,23551) | 101.02(67.85,137.37) | 33739(16147,58167) | 94.32(45.07,162.78) | -0.37 (-0.50 - -0.23) | <0.001 |
| Australasia | 14821(7156,26191) | 132.21(63.81,234.17) | 20159(9818,36175) | 131.56(64.73,239.20) | -0.01 (-0.04 - 0.02) | 0.599 |
| Caribbean | 17663(11617,25664) | 101.76(67.58,150.71) | 20220(12295,32519) | 82.22(49.96,132.79) | -0.68 (-0.77 - -0.58) | <0.001 |
| Central Asia | 30043(17394,49365) | 95.51(56.51,156.75) | 44579(23836,75388) | 87.49(47.62,147.53) | -0.27 (-0.43 - -0.11) | <0.001 |
| Central Europe | 43722(20946,77721) | 68.60(33.30,120.22) | 36544(16800,66756) | 65.05(31.31,110.44) | -0.15 (-0.27 - -0.02) | 0.019 |
| Central Latin America | 58248(35203,91273) | 75.68(46.08,121.66) | 90882(52515,151114) | 65.23(37.72,107.83) | -0.44 (-0.57 - -0.30) | <0.001 |
| Central Sub-Saharan Africa | 24908(12788,45501) | 108.58(55.70,199.08) | 58568(28189,108053) | 96.33(47.11,182.51) | -0.24 (-0.61 - 0.14) | 0.21 |
| East Asia | 131545(61772,253737) | 21.42(9.42,40.26) | 191005(81911,359160) | 25.32(11.54,47.09) | 0.51 (0.38 - 0.64) | <0.001 |
| Eastern Europe | 117627(56926,209129) | 100.99(49.41,177.11) | 99661(45311,180280) | 88.84(43.05,155.54) | -0.39 (-0.52 - -0.26) | <0.001 |
| Eastern Sub-Saharan Africa | 84708(53596,132221) | 108.42(68.58,172.33) | 154698(92189,252512) | 78.88(46.64,132.17) | -1.07 (-1.17 - -0.97) | <0.001 |
| High-income Asia Pacific | 95151(42634,172996) | 104.74(47.30,194.88) | 81819(37076,144600) | 106.88(48.64,195.86) | 0.03 (-0.06 - 0.12) | 0.45 |
| High-income North America | 245484(120275,399318) | 151.05(73.87,244.72) | 240695(121198,410625) | 135.38(68.29,228.15) | -0.44 (-0.71 - -0.16) | 0.002 |
| North Africa and Middle East | 136961(102794,176881) | 98.95(73.05,127.98) | 250581(136453,408191) | 76.41(41.78,122.98) | -0.91 (-1.14 - -0.68) | <0.001 |
| Oceania | 2426(1157,4462) | 87.40(41.15,162.54) | 5079(3512,6977) | 75.57(51.87,104.81) | -0.50 (-0.57 - -0.43) | <0.001 |
| South Asia | 687975(396196,1133252) | 143.88(78.78,238.00) | 1403850(753530,2287200) | 145.55(77.68,235.87) | 0.03 (-0.27 - 0.34) | 0.844 |
| Southeast Asia | 94730(56683,149538) | 43.63(25.48,68.03) | 146302(76831,248468) | 38.37(20.18,65.40) | -0.41 (-0.53 - -0.30) | <0.001 |
| Southern Latin America | 32099(15499,54896) | 129.69(62.59,223.00) | 44944(21305,75162) | 124.13(58.88,207.58) | -0.17 (-0.24 - -0.11) | <0.001 |
| Southern Sub-Saharan Africa | 37745(19970,66170) | 157.34(80.71,280.23) | 50372(23257,94536) | 113.77(53.19,208.75) | -1.02 (-1.21 - -0.83) | <0.001 |
| Tropical Latin America | 50019(27405,81971) | 68.04(36.19,112.63) | 204770(103778,352956) | 159.51(83.19,273.68) | 2.87 (2.45 - 3.28) | <0.001 |
| Western Europe | 114797(68557,177344) | 57.07(34.08,88.57) | 139205(67417,231802) | 69.77(34.31,114.60) | 0.61 (0.53 - 0.68) | <0.001 |
| Western Sub-Saharan Africa | 152810(97705,226199) | 191.50(118.73,285.54) | 297533(154701,522899) | 135.19(69.86,228.20) | -1.05 (-1.25 - -0.86) | <0.001 |

**Table S1B The prevalence of secondary infertility impairment due to  sexually transmitted infections excluding HIV and their AAPCs from 1990 to 2021 at the global and regional levels**

|  | **1990** | | **2021** | | **1990-2021** | |
| --- | --- | --- | --- | --- | --- | --- |
|  | **Prevalent cases**  **No. (95% UI)** | **ASPR per 100 000**  **No. (95% UI)** | **Prevalent cases**  **No. (95% UI)** | **ASPR per 100 000**  **No. (95% UI)** | **AAPC_95ci** | **P value** |
| **Global** | 8521598(6541833,10516873) | 347.9(263.1,432.8) | 14798641(11832800,18075845) | 365.0(292.3,443.6) | 0.16 (0.12 - 0.20) | <0.001 |
| **Age** |  |  |  |  |  |  |
| 15-19 years | 61377(20687,117925) | 24.02(8.10,46.15) | 87942(31622,154320) | 28.96(10.41,50.82) | 0.55 (0.42 - 0.67) | <0.001 |
| 20-24 years | 242195(106760,391933) | 99.21(43.73,160.54) | 359590(154542,542718) | 122.41(52.61,184.75) | ＜0.000001 | <0.001 |
| 25-29 years | 737256(419473,1072312) | 334.96(190.58,487.19) | 1125931(660081,1558992) | 386.93(226.84,535.76) | 0.45 (0.38 - 0.52) | <0.001 |
| 30-34 years | 1550023(1038808,2102166) | 815.33(546.43,1105.77) | 2631371(1693937,3326541) | 880.26(566.67,1112.81) | 0.24 (0.19 - 0.29) | <0.001 |
| 35-39 years | 2417765(1711776,3111343) | 1393.90(986.88,1793.76) | 4107256(2991774,4920288) | 1478.48(1076.94,1771.14) | 0.21 (0.13 - 0.29) | <0.001 |
| 40-44 years | 2680221(1964206,3523248) | 1911.37(1400.75,2512.56) | 4750653(3520964,5827356) | 1914.89(1419.23,2348.89) | 0.03 (-0.06 - 0.11) | 0.544 |
| 45-49 years | 832762(196337,1891479) | 731.77(172.53,1662.10) | 1735898(359397,4051817) | 736.67(152.52,1719.48) | -0.06 (-0.39 - 0.27) | 0.738 |
| **Socio-demographic index** |  |  |  |  |  |  |
| High SDI | 1441048(979905,1906715) | 294.6(201.1,389.4) | 1834198(1295632,2371535) | 325.5(232.6,415.9) | 0.16 (0.08 - 0.23) | <0.001 |
| High-middle SDI | 1481262(1115059,1873048) | 276.4(206.5,353.9) | 2128241(1667345,2698255) | 292.1(232.3,361.6) | 0.35 (0.24 - 0.45) | <0.001 |
| Low SDI | 1367815(1121286,1619674) | 732.7(600.2,869.1) | 2651596(2270309,3070375) | 565.9(478.4,666.4) | -0.83 (-0.92 - -0.75) | <0.001 |
| Low-middle SDI | 2052515(1613857,2520866) | 439.9(340.6,540.8) | 3949470(3172932,4742149) | 405.3(324.3,489.8) | -0.24 (-0.38 - -0.10) | <0.001 |
| Middle SDI | 2171650(1649738,2740961) | 283.4(210.5,362.9) | 4225662(3288343,5262223) | 316.3(247.9,390.3) | 0.36 (0.32 - 0.40) | <0.001 |
| **Region** |  |  |  |  |  |  |
| Andean Latin America | 67748(52102,83696) | 415.6(319.5,510.1) | 184765(127820,231335) | 519.7(360.3,651.1) | 0.91 (0.50 - 1.33) | <0.001 |
| Australasia | 50948(26824,81186) | 445.3(235.8,710.0) | 75086(38872,118303) | 464.0(242.6,730.0) | 0.15 (0.11 - 0.20) | <0.001 |
| Caribbean | 52196(43260,61695) | 314.1(261.4,372.7) | 76690(65831,89525) | 313.1(268.8,364.1) | -0.03 (-0.07 - 0.02) | 0.217 |
| Central Asia | 123305(102059,146860) | 415.1(338.4,494.7) | 219871(180127,256020) | 422.8(345.1,493.0) | 0.05 (-0.03 - 0.14) | 0.232 |
| Central Europe | 223523(181068,270637) | 334.4(270.6,403.8) | 218610(185765,254544) | 361.6(308.9,417.5) | 0.24 (0.17 - 0.30) | <0.001 |
| Central Latin America | 206760(164215,254164) | 290.6(227.6,358.0) | 433079(366130,503917) | 310.3(262.9,361.4) | 0.22 (0.14 - 0.31) | <0.001 |
| Central Sub-Saharan Africa | 143516(118618,174360) | 722.9(590.7,890.5) | 350822(295780,420274) | 643.0(538.8,789.8) | -0.42 (-0.86 - 0.01) | 0.058 |
| East Asia | 1585025(1175245,2075387) | 270.8(197.1,364.0) | 2240762(1695249,2939360) | 279.0(218.4,353.6) | 0.09 (-0.09 - 0.27) | 0.308 |
| Eastern Europe | 399800(288098,517307) | 330.2(237.1,428.9) | 385424(297083,486345) | 318.9(247.9,396.6) | -0.11 (-0.18 - -0.03) | 0.004 |
| Eastern Sub-Saharan Africa | 434763(363246,515028) | 637.9(524.7,758.5) | 883431(768752,1015089) | 493.1(425.3,575.0) | -0.83 (-0.91 - -0.75) | <0.001 |
| High-income Asia Pacific | 554829(364777,726760) | 560.2(372.2,737.3) | 560598(360500,740776) | 605.0(404.1,780.1) | 0.29 (0.20 - 0.38) | <0.001 |
| High-income North America | 438623(250380,635783) | 267.9(153.6,387.6) | 561885(370231,748427) | 306.5(204.6,404.1) | 0.44 (0.09 - 0.80) | 0.014 |
| North Africa and Middle East | 263233(216024,321761) | 207.4(167.9,253.5) | 770174(606484,976612) | 233.1(182.0,298.0) | 0.42 (0.30 - 0.53) | <0.001 |
| Oceania | 12770(9774,15504) | 500.3(377.0,621.1) | 22542(18613,25692) | 343.4(281.4,393.8) | -1.24 (-1.32 - -1.15) | <0.001 |
| South Asia | 2084464(1534665,2638317) | 467.6(337.9,595.4) | 3854814(2955051,4786526) | 399.6(305.1,499.8) | -0.51 (-0.62 - -0.40) | <0.001 |
| Southeast Asia | 295710(232297,371562) | 143.5(111.1,182.0) | 547953(439116,676991) | 142.2(114.8,175.0) | -0.01 (-0.09 - 0.07) | 0.836 |
| Southern Latin America | 114323(87761,144122) | 473.4(363.5,599.0) | 167279(128821,211860) | 448.7(345.5,565.3) | -0.13 (-0.23 - -0.03) | 0.009 |
| Southern Sub-Saharan Africa | 154470(120476,193825) | 688.8(529.5,862.3) | 232031(189393,279604) | 523.1(425.0,632.3) | -0.91 (-1.10 - -0.72) | <0.001 |
| Tropical Latin America | 100856(70911,131593) | 139.9(98.0,183.6) | 655827(502242,815850) | 491.7(376.5,612.3) | 4.18 (3.91 - 4.46) | <0.001 |
| Western Europe | 270325(187502,357058) | 133.0(92.2,176.0) | 445145(318144,577573) | 202.4(147.5,257.7) | 1.33 (1.06 - 1.60) | <0.001 |
| Western Sub-Saharan Africa | 944412(782506,1119395) | 1346.7(1106.8,1605.5) | 1911854(1616770,2234747) | 954.0(800.7,1126.8) | -1.10 (-1.20 - -1.00) | <0.001 |

**Table S2A The YLD of primary infertility impairment due to sexually transmitted infections excluding HIV and their AAPCs from 1990 to 2021 at the global and regional levels**

|  | **1990** | | **2021** | | **1990-2021** | |
| --- | --- | --- | --- | --- | --- | --- |
|  | **YLD**  **No. (95% UI)** | **Age-standardized**  **YLD rate**  **per 100 000**  **No. (95% UI)** | **YLD**  **No. (95% UI)** | **Age-standardized**  **YLD rate**  **per 100 000**  **No. (95% UI)** | **AAPC_95ci** | **P value** |
| **Global** | 16400(6358,35203) | 0.64(0.25,1.42) | 27018(10105,61692) | 0.67(0.25,1.52) | 0.15 (0.08 - 0.21) | <0.001 |
| **Age** |  |  |  |  |  |  |
| 15-19 years | 484(116,1316) | 0.19(0.05,0.51) | 490(82,1382) | 0.16(0.03,0.46) | -0.55 (-0.75 - -0.36) | <0.001 |
| 20-24 years | 1717(599,3982) | 0.70(0.25,1.63) | 2009(606,4599) | 0.68(0.21,1.57) | -0.11 (-0.19 - -0.02) | 0.012 |
| 25-29 years | 3156(982,7548) | 1.43(0.45,3.43) | 4157(1234,10125) | 1.43(0.42,3.48) | -0.01 (-0.09 - 0.06) | 0.701 |
| 30-34 years | 3246(845,8323) | 1.71(0.44,4.38) | 4820(1023,13515) | 1.61(0.34,4.52) | -0.23 (-0.31 - -0.15) | <0.001 |
| 35-39 years | 3084(758,8589) | 1.78(0.44,4.95) | 5300(1192,15478) | 1.91(0.43,5.57) | 0.22 (0.10 - 0.34) | <0.001 |
| 40-44 years | 3505(978,9697) | 2.50(0.70,6.91) | 7294(1941,20140) | 2.94(0.78,8.12) | 0.51 (0.39 - 0.64) | <0.001 |
| 45-49 years | 1207(220,3399) | 1.06(0.19,2.99) | 2948(475,8478) | 1.25(0.20,3.60) | 0.45 (0.08 - 0.82) | 0.017 |
| **Socio-demographic index** |  |  |  |  |  |  |
| High SDI | 3596(1258,8185) | 0.75(0.26,1.70) | 3691(1250,8483) | 0.71(0.24,1.60) | -0.12 (-0.16 - -0.07) | <0.001 |
| High-middle SDI | 2339(854,5223) | 0.43(0.16,0.99) | 2800(974,6518) | 0.41(0.15,0.94) | -0.23 (-0.43 - -0.02) | 0.03 |
| Low SDI | 2180(869,4397) | 1.06(0.41,2.25) | 4286(1661,9209) | 0.87(0.33,1.88) | -0.61 (-0.77 - -0.46) | <0.001 |
| Low-middle SDI | 4568(1818,9683) | 0.91(0.37,1.97) | 8794(3442,19744) | 0.89(0.35,2.00) | -0.04 (-0.23 - 0.16) | 0.723 |
| Middle SDI | 3703(1435,7921) | 0.45(0.17,1.01) | 7433(2673,17131) | 0.57(0.21,1.29) | 0.73 (0.65 - 0.80) | <0.001 |
| **Region** |  |  |  |  |  |  |
| Andean Latin America | 129(52,288) | 0.76(0.31,1.70) | 254(83,623) | 0.71(0.23,1.75) | -0.38 (-0.68 - -0.07) | 0.016 |
| Australasia | 112(35,263) | 1.00(0.31,2.35) | 152(50,374) | 0.99(0.32,2.46) | -0.03 (-0.11 - 0.05) | 0.44 |
| Caribbean | 133(53,284) | 0.76(0.31,1.67) | 152(57,339) | 0.62(0.23,1.37) | -0.69 (-0.78 - -0.59) | <0.001 |
| Central Asia | 225(86,486) | 0.71(0.27,1.58) | 332(121,778) | 0.65(0.24,1.52) | -0.29 (-0.42 - -0.15) | <0.001 |
| Central Europe | 327(107,797) | 0.51(0.17,1.22) | 274(90,657) | 0.49(0.17,1.13) | -0.14 (-0.26 - -0.02) | 0.027 |
| Central Latin America | 438(162,967) | 0.57(0.21,1.26) | 682(259,1484) | 0.49(0.19,1.06) | -0.44 (-0.58 - -0.30) | <0.001 |
| Central Sub-Saharan Africa | 185(67,428) | 0.81(0.28,1.85) | 437(146,1034) | 0.72(0.24,1.73) | -0.44 (-0.67 - -0.21) | <0.001 |
| East Asia | 983(307,2302) | 0.16(0.05,0.38) | 1423(438,3419) | 0.19(0.06,0.46) | 0.51 (0.38 - 0.64) | <0.001 |
| Eastern Europe | 882(296,2076) | 0.76(0.26,1.78) | 745(244,1790) | 0.66(0.22,1.52) | -0.40 (-0.52 - -0.27) | <0.001 |
| Eastern Sub-Saharan Africa | 633(243,1327) | 0.81(0.31,1.72) | 1155(439,2621) | 0.59(0.22,1.35) | -1.05 (-1.16 - -0.94) | <0.001 |
| High-income Asia Pacific | 715(223,1711) | 0.79(0.25,1.88) | 614(187,1476) | 0.80(0.24,2.01) | 0.04 (-0.05 - 0.13) | 0.418 |
| High-income North America | 1848(633,4160) | 1.14(0.39,2.54) | 1809(602,4258) | 1.02(0.34,2.40) | -0.44 (-0.71 - -0.17) | 0.001 |
| North Africa and Middle East | 1030(428,2034) | 0.74(0.31,1.49) | 1875(698,4185) | 0.57(0.21,1.28) | -0.93 (-1.15 - -0.70) | <0.001 |
| Oceania | 18(6,43) | 0.65(0.22,1.57) | 38(15,81) | 0.57(0.23,1.20) | -0.47 (-0.56 - -0.39) | <0.001 |
| South Asia | 5127(2044,11218) | 1.07(0.42,2.39) | 10468(3921,23975) | 1.09(0.41,2.49) | 0.05 (-0.23 - 0.33) | 0.73 |
| Southeast Asia | 709(276,1490) | 0.33(0.13,0.71) | 1094(408,2451) | 0.29(0.11,0.64) | -0.42 (-0.54 - -0.30) | <0.001 |
| Southern Latin America | 241(86,560) | 0.97(0.34,2.26) | 337(117,779) | 0.93(0.32,2.14) | -0.18 (-0.24 - -0.11) | <0.001 |
| Southern Sub-Saharan Africa | 282(101,640) | 1.18(0.41,2.75) | 375(127,899) | 0.85(0.29,2.05) | -1.03 (-1.23 - -0.84) | <0.001 |
| Tropical Latin America | 375(140,835) | 0.51(0.18,1.15) | 1533(552,3487) | 1.19(0.43,2.67) | 2.87 (2.44 - 3.30) | <0.001 |
| Western Europe | 864(330,1913) | 0.43(0.16,0.95) | 1045(347,2392) | 0.52(0.18,1.13) | 0.60 (0.51 - 0.68) | <0.001 |
| Western Sub-Saharan Africa | 1144(445,2356) | 1.43(0.55,3.00) | 2224(827,4983) | 1.01(0.37,2.29) | -1.07 (-1.27 - -0.86) | <0.001 |

**Table S2B The YLD of secondary infertility impairment due to  sexually transmitted infections excluding HIV and their AAPCs from 1990 to 2021 at the global and regional levels**

|  | **1990** | | **2021** | | **1990-2021** | |
| --- | --- | --- | --- | --- | --- | --- |
|  | **YLD**  **No. (95% UI)** | **Age-standardized**  **YLD rate**  **per 100 000**  **No. (95% UI)** | **YLD**  **No. (95% UI)** | **Age-standardized**  **YLD rate**  **per 100 000**  **No. (95% UI)** | **AAPC_95ci** | **P value** |
| **Global** | 43783(16508,98002) | 1.79(0.67,3.99) | 75943(28980,169722) | 1.87(0.71,4.16) | 0.16 (0.12 - 0.19) | <0.001 |
| **Age** |  |  |  |  |  |  |
| 15-19 years | 315(70,807) | 0.12(0.03,0.32) | 452(102,1076) | 0.15(0.03,0.35) | 0.55 (0.41 - 0.68) | <0.001 |
| 20-24 years | 1253(355,3177) | 0.51(0.15,1.30) | 1856(564,4503) | 0.63(0.19,1.53) | 0.66 (0.57 - 0.75) | <0.001 |
| 25-29 years | 3803(1248,9028) | 1.73(0.57,4.10) | 5801(2015,13489) | 1.99(0.69,4.64) | 0.44 (0.37 - 0.52) | <0.001 |
| 30-34 years | 7962(2844,18160) | 4.19(1.50,9.55) | 13499(5136,29965) | 4.52(1.72,10.02) | 0.24 (0.19 - 0.29) | <0.001 |
| 35-39 years | 12409(4795,27336) | 7.15(2.76,15.76) | 21046(8277,44507) | 7.58(2.98,16.02) | 0.21 (0.13 - 0.28) | <0.001 |
| 40-44 years | 13758(5069,29870) | 9.81(3.61,21.30) | 24361(9177,52235) | 9.82(3.70,21.06) | 0.02 (-0.05 - 0.10) | 0.595 |
| 45-49 years | 4285(767,12976) | 3.76(0.67,11.40) | 8929(1348,27177) | 3.79(0.57,11.53) | -0.05 (-0.36 - 0.26) | 0.734 |
| **Socio-demographic index** |  |  |  |  |  |  |
| High SDI | 7440(2665,17502) | 1.52(0.54,3.58) | 9453(3466,21805) | 1.68(0.62,3.83) | 0.15 (0.09 - 0.21) | <0.001 |
| High-middle SDI | 7621(2866,16935) | 1.42(0.53,3.15) | 10934(4197,25556) | 1.50(0.59,3.46) | 0.34 (0.25 - 0.43) | <0.001 |
| Low SDI | 7006(2738,15077) | 3.75(1.49,8.17) | 13569(5230,29201) | 2.90(1.11,6.31) | -0.84 (-0.92 - -0.75) | <0.001 |
| Low-middle SDI | 10519(4029,23080) | 2.25(0.86,4.91) | 20247(7746,44436) | 2.08(0.79,4.61) | -0.24 (-0.37 - -0.10) | <0.001 |
| Middle SDI | 11160(4255,24681) | 1.46(0.54,3.20) | 21692(8510,49588) | 1.62(0.64,3.67) | 0.35 (0.31 - 0.39) | <0.001 |
| **Region** |  |  |  |  |  |  |
| Andean Latin America | 347(132,780) | 2.13(0.81,4.79) | 948(338,2093) | 2.67(0.95,5.88) | 0.92 (0.55 - 1.30) | <0.001 |
| Australasia | 265(82,637) | 2.31(0.72,5.56) | 388(123,904) | 2.40(0.77,5.62) | 0.14 (0.07 - 0.20) | <0.001 |
| Caribbean | 268(106,581) | 1.61(0.64,3.52) | 393(151,863) | 1.60(0.62,3.53) | -0.03 (-0.07 - 0.01) | 0.142 |
| Central Asia | 633(253,1363) | 2.13(0.85,4.56) | 1126(428,2502) | 2.17(0.82,4.81) | 0.04 (-0.03 - 0.12) | 0.246 |
| Central Europe | 1149(442,2485) | 1.72(0.66,3.71) | 1123(434,2420) | 1.86(0.72,4.03) | 0.22 (0.16 - 0.28) | <0.001 |
| Central Latin America | 1063(412,2396) | 1.49(0.58,3.36) | 2223(881,4916) | 1.59(0.63,3.53) | 0.22 (0.14 - 0.29) | <0.001 |
| Central Sub-Saharan Africa | 734(285,1634) | 3.70(1.44,8.38) | 1792(698,3886) | 3.28(1.27,7.31) | -0.46 (-0.86 - -0.06) | 0.025 |
| East Asia | 8151(3096,17394) | 1.39(0.52,2.98) | 11505(4299,25904) | 1.43(0.53,3.21) | 0.09 (-0.06 - 0.24) | 0.253 |
| Eastern Europe | 2060(781,4513) | 1.70(0.65,3.74) | 1984(775,4401) | 1.64(0.64,3.65) | -0.11 (-0.20 - -0.02) | 0.015 |
| Eastern Sub-Saharan Africa | 2227(868,4884) | 3.27(1.28,7.20) | 4526(1752,9662) | 2.53(0.97,5.47) | -0.83 (-0.91 - -0.75) | <0.001 |
| High-income Asia Pacific | 2861(982,6730) | 2.89(0.98,6.73) | 2890(1031,6541) | 3.12(1.10,7.15) | 0.28 (0.20 - 0.37) | <0.001 |
| High-income North America | 2273(716,5339) | 1.39(0.44,3.27) | 2901(1039,6685) | 1.58(0.56,3.65) | 0.43 (0.11 - 0.75) | 0.007 |
| North Africa and Middle East | 1351(533,2923) | 1.06(0.42,2.30) | 3953(1486,9258) | 1.20(0.45,2.80) | 0.42 (0.32 - 0.52) | <0.001 |
| Oceania | 66(24,143) | 2.57(0.93,5.57) | 115(45,248) | 1.76(0.69,3.79) | -1.24 (-1.32 - -1.17) | <0.001 |
| South Asia | 10686(3983,23594) | 2.40(0.89,5.26) | 19761(7551,44267) | 2.05(0.78,4.62) | -0.51 (-0.63 - -0.39) | <0.001 |
| Southeast Asia | 1520(576,3400) | 0.74(0.27,1.64) | 2816(1056,6211) | 0.73(0.27,1.61) | -0.01 (-0.08 - 0.07) | 0.881 |
| Southern Latin America | 587(227,1326) | 2.43(0.94,5.50) | 860(322,1986) | 2.31(0.87,5.35) | -0.13 (-0.23 - -0.03) | 0.007 |
| Southern Sub-Saharan Africa | 793(306,1787) | 3.53(1.37,7.87) | 1190(465,2602) | 2.68(1.06,5.92) | -0.92 (-1.13 - -0.70) | <0.001 |
| Tropical Latin America | 518(191,1137) | 0.72(0.26,1.57) | 3369(1298,7490) | 2.53(0.97,5.57) | 4.17 (3.68 - 4.66) | <0.001 |
| Western Europe | 1394(507,3176) | 0.69(0.25,1.56) | 2292(838,5455) | 1.04(0.39,2.46) | 1.33 (1.06 - 1.59) | <0.001 |
| Western Sub-Saharan Africa | 4839(1865,10138) | 6.90(2.68,14.44) | 9789(3812,21116) | 4.88(1.92,10.68) | -1.10 (-1.20 - -1.01) | <0.001 |
